# Supplementary material for: Theoretical identification on the role of Lys15 for Sulfolobus tokodaii hexokinase
Source: Royal Society of Chemistry journal article supplement (doi:10.1039/c4ra16652c), 2015-01-01

## Supporting Information

### Theoretical identification on the role of Lys15 for Sulfolobus tokodaii hexokinase

Jinhu Wang, Wen Wang, Chunli liu, Yuliang Zhao, Han Cao, Yongjun Liu, Rutao Liu\*

The atomic coordinates of these atoms (QM part) for the ATP-bound StHK.

|      |    |     |     |    |        |        |         |      |       |   |
|------|----|-----|-----|----|--------|--------|---------|------|-------|---|
| ATOM | 61 | N   | LYS | 15 | -6.406 | -7.181 | 4.486   | 1.00 | 18.96 | N |
| ATOM | 62 | HN  | LYS | 15 | -6.584 | -6.526 | 3.721   | 1.00 | 0.00  | H |
| ATOM | 63 | CA  | LYS | 15 | -6.947 | -6.868 | 5.810   | 1.00 | 27.33 | C |
| ATOM | 64 | HA  | LYS | 15 | -6.741 | -7.693 | 6.506   | 1.00 | 0.00  | H |
| ATOM | 65 | CB  | LYS | 15 | -6.376 | -5.555 | 6.392   | 1.00 | 31.73 | C |
| ATOM | 66 | HB1 | LYS | 15 | -6.640 | -4.762 | 5.683   | 1.00 | 0.00  | H |
| ATOM | 67 | HB2 | LYS | 15 | -6.916 | -5.314 | 7.318   | 1.00 | 0.00  | H |
| ATOM | 68 | CG  | LYS | 15 | -4.855 | -5.573 | 6.658   | 1.00 | 46.58 | C |
| ATOM | 69 | HG1 | LYS | 15 | -4.671 | -5.553 | 7.738   | 1.00 | 0.00  | H |
| ATOM | 70 | HG2 | LYS | 15 | -4.418 | -6.512 | 6.288   | 1.00 | 0.00  | H |
| ATOM | 71 | CD  | LYS | 15 | -4.112 | -4.391 | 6.017   | 1.00 | 52.98 | C |
| ATOM | 72 | HD1 | LYS | 15 | -4.645 | -3.456 | 6.234   | 1.00 | 0.00  | H |
| ATOM | 73 | HD2 | LYS | 15 | -3.117 | -4.281 | 6.469   | 1.00 | 0.00  | H |
| ATOM | 74 | CE  | LYS | 15 | -3.948 | -4.552 | 4.507   | 1.00 | 55.66 | C |
| ATOM | 75 | HE1 | LYS | 15 | -3.367 | -5.443 | 4.266   | 1.00 | 0.00  | H |
| ATOM | 76 | HE2 | LYS | 15 | -4.907 | -4.644 | 3.995   | 1.00 | 0.00  | H |
| ATOM | 77 | NZ  | LYS | 15 | -3.255 | -3.362 | 3.914   | 1.00 | 52.51 | N |
| ATOM | 78 | HZ1 | LYS | 15 | -2.818 | -3.506 | 2.982   | 1.00 | 0.00  | H |
| ATOM | 79 | HZ2 | LYS | 15 | -3.977 | -2.607 | 3.775   | 1.00 | 0.00  | H |
| ATOM | 80 | HZ3 | LYS | 15 | -2.459 | -3.002 | 4.482   | 1.00 | 0.00  | H |
| ATOM | 81 | C   | LYS | 15 | -8.476 | -6.701 | 5.629   | 1.00 | 26.81 | C |
| ATOM | 82 | O   | LYS | 15 | -8.867 | -5.810 | 4.884   | 1.00 | 22.30 | O |
| TER  | 83 |     | LYS | 15 |        |        |         |      |       |   |
| ATOM | 84 | N   | ASP | 71 | -4.763 | -1.672 | -12.390 | 1.00 | 30.04 | N |
| ATOM | 85 | HN  | ASP | 71 | -4.335 | -2.597 | -12.310 | 1.00 | 0.00  | H |
| ATOM | 86 | CA  | ASP | 71 | -3.932 | -0.599 | -12.945 | 1.00 | 32.00 | C |
| ATOM | 87 | HA  | ASP | 71 | -4.120 | 0.363  | -12.457 | 1.00 | 0.00  | H |
| ATOM | 88 | CB  | ASP | 71 | -2.438 | -0.932 | -12.728 | 1.00 | 28.61 | C |
| ATOM | 89 | HB1 | ASP | 71 | -2.193 | -1.901 | -13.179 | 1.00 | 0.00  | H |
| ATOM | 90 | HB2 | ASP | 71 | -1.807 | -0.181 | -13.225 | 1.00 | 0.00  | H |
| ATOM | 91 | CG  | ASP | 71 | -2.073 | -0.963 | -11.236 | 1.00 | 28.31 | C |
| ATOM | 92 | OD1 | ASP | 71 | -1.207 | -1.813 | -10.906 | 1.00 | 20.80 | O |
| ATOM | 93 | OD2 | ASP | 71 | -2.663 | -0.140 | -10.478 | 1.00 | 22.40 | O |

|      |     |      |     |     |        |        |         |      |       |   |
|------|-----|------|-----|-----|--------|--------|---------|------|-------|---|
| ATOM | 94  | C    | ASP | 71  | -4.161 | -0.378 | -14.449 | 1.00 | 37.73 | C |
| ATOM | 95  | O    | ASP | 71  | -4.172 | 0.787  | -14.873 | 1.00 | 40.83 | O |
| TER  | 96  |      | ASP | 71  |        |        |         |      |       |   |
| ATOM | 97  | N    | ASP | 95  | -7.567 | 0.144  | -4.299  | 1.00 | 17.31 | N |
| ATOM | 98  | HN   | ASP | 95  | -6.790 | 0.208  | -4.954  | 1.00 | 0.00  | H |
| ATOM | 99  | CA   | ASP | 95  | -7.229 | 0.571  | -2.923  | 1.00 | 21.42 | C |
| ATOM | 100 | HA   | ASP | 95  | -7.983 | 0.167  | -2.238  | 1.00 | 0.00  | H |
| ATOM | 101 | CB   | ASP | 95  | -5.893 | -0.102 | -2.537  | 1.00 | 22.01 | C |
| ATOM | 102 | HB1  | ASP | 95  | -5.712 | 0.058  | -1.467  | 1.00 | 0.00  | H |
| ATOM | 103 | HB2  | ASP | 95  | -6.005 | -1.185 | -2.676  | 1.00 | 0.00  | H |
| ATOM | 104 | CG   | ASP | 95  | -4.662 | 0.364  | -3.349  | 1.00 | 25.03 | C |
| ATOM | 105 | OD1  | ASP | 95  | -4.861 | 1.012  | -4.414  | 1.00 | 18.38 | O |
| ATOM | 106 | OD2  | ASP | 95  | -3.547 | 0.021  | -2.870  | 1.00 | 33.04 | O |
| ATOM | 107 | C    | ASP | 95  | -7.182 | 2.098  | -2.641  | 1.00 | 20.21 | C |
| ATOM | 108 | O    | ASP | 95  | -7.736 | 2.533  | -1.634  | 1.00 | 19.04 | O |
| TER  | 109 |      | ASP | 95  |        |        |         |      |       |   |
| ATOM | 110 | N    | THR | 116 | 3.460  | -1.219 | 0.044   | 1.00 | 22.49 | N |
| ATOM | 111 | HN   | THR | 116 | 2.461  | -1.329 | -0.001  | 1.00 | 0.00  | H |
| ATOM | 112 | CA   | THR | 116 | 4.280  | -2.186 | -0.681  | 1.00 | 17.24 | C |
| ATOM | 113 | HA   | THR | 116 | 5.198  | -2.340 | -0.136  | 1.00 | 0.00  | H |
| ATOM | 114 | CB   | THR | 116 | 3.616  | -3.525 | -0.893  | 1.00 | 23.75 | C |
| ATOM | 115 | HB   | THR | 116 | 2.823  | -3.475 | -1.671  | 1.00 | 0.00  | H |
| ATOM | 116 | OG1  | THR | 116 | 3.040  | -3.947 | 0.327   | 1.00 | 20.76 | O |
| ATOM | 117 | HG1  | THR | 116 | 2.192  | -3.454 | 0.384   | 1.00 | 0.00  | H |
| ATOM | 118 | CG2  | THR | 116 | 4.640  | -4.586 | -1.300  | 1.00 | 21.59 | C |
| ATOM | 119 | HG21 | THR | 116 | 4.134  | -5.553 | -1.499  | 1.00 | 0.00  | H |
| ATOM | 120 | HG22 | THR | 116 | 5.180  | -4.288 | -2.223  | 1.00 | 0.00  | H |
| ATOM | 121 | HG23 | THR | 116 | 5.365  | -4.747 | -0.484  | 1.00 | 0.00  | H |
| ATOM | 122 | C    | THR | 116 | 4.620  | -1.641 | -2.036  | 1.00 | 24.46 | C |
| ATOM | 123 | O    | THR | 116 | 5.774  | -1.687 | -2.468  | 1.00 | 18.70 | O |
| TER  | 124 |      | THR | 116 |        |        |         |      |       |   |
| ATOM | 125 | N    | ASP | 140 | 6.608  | 2.468  | -8.569  | 1.00 | 18.27 | N |
| ATOM | 126 | HN   | ASP | 140 | 5.695  | 2.394  | -9.003  | 1.00 | 0.00  | H |
| ATOM | 127 | CA   | ASP | 140 | 6.633  | 2.187  | -7.124  | 1.00 | 22.74 | C |
| ATOM | 128 | HA   | ASP | 140 | 5.654  | 2.589  | -6.814  | 1.00 | 0.00  | H |
| ATOM | 129 | CB   | ASP | 140 | 6.562  | 0.716  | -6.701  | 1.00 | 16.60 | C |
| ATOM | 130 | HB1  | ASP | 140 | 7.312  | 0.109  | -7.222  | 1.00 | 0.00  | H |
| ATOM | 131 | HB2  | ASP | 140 | 6.799  | 0.660  | -5.633  | 1.00 | 0.00  | H |
| ATOM | 132 | CG   | ASP | 140 | 5.152  | 0.106  | -6.919  | 1.00 | 24.88 | C |
| ATOM | 133 | OD1  | ASP | 140 | 4.200  | 0.911  | -7.169  | 1.00 | 22.74 | O |
| ATOM | 134 | OD2  | ASP | 140 | 5.034  | -1.130 | -6.755  | 1.00 | 19.30 | O |
| ATOM | 135 | C    | ASP | 140 | 7.599  | 3.088  | -6.322  | 1.00 | 15.06 | C |
| ATOM | 136 | O    | ASP | 140 | 7.826  | 2.827  | -5.145  | 1.00 | 16.59 | O |
| TER  | 137 |      | ASP | 140 |        |        |         |      |       |   |

|        |     |     |     |   |        |        |        |        |       |      |   |
|--------|-----|-----|-----|---|--------|--------|--------|--------|-------|------|---|
| HETATM | 138 | C1  | GLO | 1 | 1.320  | -0.736 | -6.864 | 1.00   | 12.70 |      | C |
| HETATM | 139 | H1  | GLO | 1 |        | 1.738  | 0.224  | -7.206 | 1.00  | 0.00 | H |
| HETATM | 140 | O1  | GLO | 1 | 2.289  | -1.734 | -6.918 | 1.00   | 18.41 |      | O |
| HETATM | 141 | H1A | GLO | 1 |        | 3.200  | -1.348 | -6.853 | 1.00  | 0.00 | H |
| HETATM | 142 | C2  | GLO | 1 | 0.122  | -1.127 | -7.727 | 1.00   | 13.93 |      | C |
| HETATM | 143 | H2  | GLO | 1 | -0.149 | -2.160 | -7.449 | 1.00   | 0.00  |      | H |
| HETATM | 144 | O2  | GLO | 1 | 0.544  | -1.040 | -9.072 | 1.00   | 17.69 |      | O |
| HETATM | 145 | H2A | GLO | 1 | -0.180 | -1.370 | -9.663 | 1.00   | 0.00  |      | H |
| HETATM | 146 | C3  | GLO | 1 | -1.113 | -0.235 | -7.485 | 1.00   | 14.37 |      | C |
| HETATM | 147 | H3  | GLO | 1 |        | -0.947 | 0.698  | -8.043 | 1.00  | 0.00 | H |
| HETATM | 148 | O3  | GLO | 1 | -2.297 | -0.859 | -7.952 | 1.00   | 15.82 |      | O |
| HETATM | 149 | H3A | GLO | 1 | -2.452 | -0.578 | -8.889 | 1.00   | 0.00  |      | H |
| HETATM | 150 | C4  | GLO | 1 | -1.348 | 0.161  | -6.034 | 1.00   | 12.99 |      | C |
| HETATM | 151 | H4  | GLO | 1 | -1.788 | -0.693 | -5.505 | 1.00   | 0.00  |      | H |
| HETATM | 152 | O4  | GLO | 1 | -2.180 | 1.299  | -5.943 | 1.00   | 16.09 |      | O |
| HETATM | 153 | H4A | GLO | 1 |        | -3.105 | 1.043  | -6.131 | 1.00  | 0.00 | H |
| HETATM | 154 | C5  | GLO | 1 | -0.037 | 0.494  | -5.326 | 1.00   | 13.50 |      | C |
| HETATM | 155 | H5  | GLO | 1 |        | 0.391  | 1.417  | -5.762 | 1.00  | 0.00 | H |
| HETATM | 156 | O5  | GLO | 1 | 0.884  | -0.586 | -5.504 | 1.00   | 13.60 |      | O |
| HETATM | 157 | C6  | GLO | 1 | -0.263 | 0.710  | -3.830 | 1.00   | 14.16 |      | C |
| HETATM | 158 | H6A | GLO | 1 |        | 0.695  | 0.852  | -3.318 | 1.00  | 0.00 | H |
| HETATM | 159 | H6B | GLO | 1 | -0.858 | 1.628  | -3.721 | 1.00   | 0.00  |      | H |
| HETATM | 160 | O6  | GLO | 1 | -0.899 | -0.396 | -3.238 | 1.00   | 15.87 |      | O |
| HETATM | 161 | H6C | GLO | 1 | -1.873 | -0.243 | -3.226 | 1.00   | 0.00  |      | H |
| HETATM | 162 | C5  | ATP | 1 | 4.040  | -2.461 | 4.310  | 1.00   | 22.91 |      | C |
| HETATM | 163 | H5  | ATP | 1 |        | 3.833  | -2.246 | 3.257  | 1.00  | 0.00 | H |
| HETATM | 164 | O5  | ATP | 1 | 4.450  | -1.237 | 4.964  | 1.00   | 24.49 |      | O |
| HETATM | 165 | C8  | ATP | 1 | 5.781  | -1.306 | 5.396  | 1.00   | 24.51 |      | C |
| HETATM | 166 | H8  | ATP | 1 |        | 6.473  | -0.791 | 4.718  | 1.00  | 0.00 | H |
| HETATM | 167 | C10 | ATP | 1 | 6.716  | 0.541  | 8.397  | 1.00   | 28.07 |      | C |
| HETATM | 168 | N9  | ATP | 1 | 5.472  | 0.042  | 8.795  | 1.00   | 30.76 |      | N |
| HETATM | 169 | C9  | ATP | 1 | 5.026  | -0.620 | 7.737  | 1.00   | 25.92 |      | C |
| HETATM | 170 | H9  | ATP | 1 |        | 4.065  | -1.113 | 7.677  | 1.00  | 0.00 | H |
| HETATM | 171 | N8  | ATP | 1 | 5.881  | -0.595 | 6.673  | 1.00   | 24.23 |      | N |
| HETATM | 172 | N12 | ATP | 1 | 8.865  | 1.513  | 8.292  | 1.00   | 31.20 |      | N |

|        |     |      |      |   |        |        |        |       |       |       |    |
|--------|-----|------|------|---|--------|--------|--------|-------|-------|-------|----|
| HETATM | 173 | C12  | ATP  | 1 | 8.949  | 1.104  | 7.019  | 1.00  | 30.86 |       | C  |
| HETATM | 174 | H12  | ATP  | 1 | 9.870  | 1.359  | 6.498  | 1.00  | 0.00  |       | H  |
| HETATM | 175 | N11  | ATP  | 1 | 8.048  | 0.406  | 6.331  | 1.00  | 25.68 |       | N  |
| HETATM | 176 | C11  | ATP  | 1 | 6.969  | 0.149  | 7.068  | 1.00  | 27.55 |       | C  |
| HETATM | 177 | C13  | ATP  | 1 | 7.761  | 1.266  | 9.016  | 1.00  | 34.82 |       | C  |
| HETATM | 178 | N13  | ATP  | 1 | 7.775  | 1.694  | 10.342 | 1.00  | 33.87 |       | N  |
| HETATM | 179 | H13B | ATP  | 1 | 8.700  | 2.103  | 10.558 | 1.00  | 0.00  |       | H  |
| HETATM | 180 | H13A | ATP  | 1 | 7.066  | 2.411  | 10.550 | 1.00  | 0.00  |       | H  |
| HETATM | 181 | C7   | ATP  | 1 | 6.144  | -2.807 | 5.503  | 1.00  | 25.14 |       | C  |
| HETATM | 182 | H7   | ATP  | 1 |        | 5.890  | -3.172 | 6.504 | 1.00  | 0.00  | H  |
| HETATM | 183 | O7   | ATP  | 1 | 7.503  | -3.080 | 5.294  | 1.00  | 22.96 |       | O  |
| HETATM | 184 | H7A  | ATP  | 1 |        | 7.632  | -3.081 | 4.325 | 1.00  | 0.00  | H  |
| HETATM | 185 | C6   | ATP  | 1 | 5.210  | -3.447 | 4.440  | 1.00  | 21.74 |       | C  |
| HETATM | 186 | H6   | ATP  | 1 |        | 4.851  | -4.428 | 4.766 | 1.00  | 0.00  | H  |
| HETATM | 187 | O6   | ATP  | 1 | 5.926  | -3.570 | 3.215  | 1.00  | 20.39 |       | O  |
| HETATM | 188 | H6A  | ATP  | 1 |        | 6.256  | -4.486 | 3.184 | 1.00  | 0.00  | H  |
| HETATM | 189 | C4   | ATP  | 1 | 2.775  | -2.978 | 4.999  | 1.00  | 17.35 |       | C  |
| HETATM | 190 | H4A  | ATP  | 1 |        | 2.388  | -3.830 | 4.432 | 1.00  | 0.00  | H  |
| HETATM | 191 | H4B  | ATP  | 1 | 3.032  | -3.311 | 6.017  | 1.00  | 0.00  |       | H  |
| HETATM | 192 | O3   | ATP  | 1 | 1.799  | -1.955 | 5.122  | 1.00  | 25.21 |       | O  |
| HETATM | 193 | P3   | ATP  | 1 | 0.402  | -1.865 | 4.210  | 1.00  | 25.58 |       | P  |
| HETATM | 194 | O3A  | ATP  | 1 | 0.347  | -0.415 | 3.749  | 1.00  | 19.33 |       | O  |
| HETATM | 195 | O3B  | ATP  | 1 | -0.762 | -2.370 | 5.027  | 1.00  | 27.75 |       | O  |
| HETATM | 196 | O2   | ATP  | 1 | 0.815  | -2.895 | 3.046  | 1.00  | 23.57 |       | O  |
| HETATM | 197 | P2   | ATP  | 1 | -0.166 | -3.242 | 1.700  | 1.00  | 22.77 |       | P  |
| HETATM | 198 | O2A  | ATP  | 1 | -1.498 | -2.530 | 1.993  | 1.00  | 24.45 |       | O  |
| HETATM | 199 | O2B  | ATP  | 1 | -0.169 | -4.735 | 1.570  | 1.00  | 18.45 |       | O  |
| HETATM | 200 | O1   | ATP  | 1 | 0.690  | -2.503 | 0.600  | 1.00  | 23.12 |       | O  |
| HETATM | 201 | P1   | ATP  | 1 | 0.117  | -1.678 | -0.952 | 1.00  | 0.00  |       | P  |
| HETATM | 202 | O1C  | ATP  | 1 | -1.397 | -1.794 | -0.746 | 1.00  | 0.00  |       | O  |
| HETATM | 203 | O1B  | ATP  | 1 | 0.761  | -2.597 | -1.952 | 1.00  | 0.00  |       | O  |
| HETATM | 204 | O1A  | ATP  | 1 | 0.756  | -0.316 | -0.692 | 1.00  | 0.00  |       | O  |
| HETATM | 205 | MG   | MGL  | 1 |        | -2.365 | -0.985 | 0.812 | 1.00  | 27.88 | LP |
| HETATM | 206 | OH2  | TIP3 | 1 | -0.776 | 0.362  | 1.346  | 1.00  | 18.54 |       | O  |
| HETATM | 207 | H1   | TIP3 | 1 | -0.133 | 0.237  | 0.571  | 1.00  | 0.00  |       | H  |
| HETATM | 208 | H2   | TIP3 | 1 | -0.312 | 0.004  | 2.137  | 1.00  | 0.00  |       | H  |
| HETATM | 209 | OH2  | TIP3 | 5 | -3.488 | -0.178 | 2.472  | 1.00  | 21.67 |       | O  |
| HETATM | 210 | H1   | TIP3 | 5 | -2.984 | 0.016  | 3.293  | 1.00  | 0.00  |       | H  |

|        |     |     |      |   |        |        |        |      |       |   |
|--------|-----|-----|------|---|--------|--------|--------|------|-------|---|
| HETATM | 211 | H2  | TIP3 | 5 | -4.287 | -0.708 | 2.749  | 1.00 | 0.00  | H |
| HETATM | 212 | OH2 | TIP3 | 6 | -2.993 | 0.431  | -0.356 | 1.00 | 23.98 | O |
| HETATM | 213 | H1  | TIP3 | 6 | -3.246 | 0.157  | -1.281 | 1.00 | 0.00  | H |
| HETATM | 214 | H2  | TIP3 | 6 | -2.553 | 1.267  | -0.555 | 1.00 | 0.00  | H |
| HETATM | 215 | OH2 | TIP3 | 7 | -3.940 | -2.062 | 0.430  | 1.00 | 26.17 | O |
| HETATM | 216 | H1  | TIP3 | 7 | -4.861 | -1.862 | 0.766  | 1.00 | 0.00  | H |
| HETATM | 217 | H2  | TIP3 | 7 | -4.155 | -2.573 | -0.368 | 1.00 | 0.00  | H |

The atomic coordinates of these atoms (QM part) for ATP-bound K15A mutant

|      |      |     |     |    |         |        |         |      |       |   |
|------|------|-----|-----|----|---------|--------|---------|------|-------|---|
| ATOM | 200  | N   | ALA | 15 | -8.326  | -5.518 | -3.313  | 1.00 | 0.00  | N |
| ATOM | 201  | HN  | ALA | 15 | -7.710  | -4.895 | -3.821  | 1.00 | 0.00  | H |
| ATOM | 202  | CA  | ALA | 15 | -9.640  | -4.989 | -3.061  | 1.00 | 0.00  | C |
| ATOM | 203  | HA  | ALA | 15 | -10.270 | -5.731 | -2.577  | 1.00 | 0.00  | H |
| ATOM | 204  | CB  | ALA | 15 | -9.555  | -3.714 | -2.201  | 1.00 | 0.00  | C |
| ATOM | 205  | HB1 | ALA | 15 | -8.944  | -2.939 | -2.718  | 1.00 | 0.00  | H |
| ATOM | 206  | HB2 | ALA | 15 | -10.559 | -3.282 | -2.003  | 1.00 | 0.00  | H |
| ATOM | 207  | HB3 | ALA | 15 | -9.066  | -3.927 | -1.228  | 1.00 | 0.00  | H |
| ATOM | 208  | C   | ALA | 15 | -10.284 | -4.620 | -4.395  | 1.00 | 0.00  | C |
| ATOM | 209  | O   | ALA | 15 | -9.725  | -3.792 | -5.139  | 1.00 | 0.00  | O |
| ATOM | 972  | N   | ASP | 71 | 7.210   | -1.891 | -11.093 | 1.00 | 30.04 | N |
| ATOM | 973  | HN  | ASP | 71 | 7.216   | -2.855 | -10.754 | 1.00 | 0.00  | H |
| ATOM | 974  | CA  | ASP | 71 | 8.264   | -0.995 | -10.626 | 1.00 | 32.00 | C |
| ATOM | 975  | HA  | ASP | 71 | 7.887   | 0.004  | -10.375 | 1.00 | 0.00  | H |
| ATOM | 976  | CB  | ASP | 71 | 8.874   | -1.582 | -9.332  | 1.00 | 28.61 | C |
| ATOM | 977  | HB1 | ASP | 71 | 9.245   | -2.593 | -9.526  | 1.00 | 0.00  | H |
| ATOM | 978  | HB2 | ASP | 71 | 9.735   | -0.986 | -9.006  | 1.00 | 0.00  | H |
| ATOM | 979  | CG  | ASP | 71 | 7.833   | -1.617 | -8.204  | 1.00 | 28.31 | C |
| ATOM | 980  | OD1 | ASP | 71 | 7.834   | -2.658 | -7.505  | 1.00 | 20.80 | O |
| ATOM | 981  | OD2 | ASP | 71 | 7.083   | -0.603 | -8.097  | 1.00 | 22.40 | O |
| ATOM | 982  | C   | ASP | 71 | 9.421   | -0.813 | -11.617 | 1.00 | 37.73 | C |
| ATOM | 983  | O   | ASP | 71 | 9.916   | 0.321  | -11.732 | 1.00 | 40.83 | O |
| ATOM | 1362 | N   | ASP | 95 | -0.606  | 1.089  | -8.456  | 1.00 | 17.31 | N |
| ATOM | 1363 | HN  | ASP | 95 | 0.377   | 0.895  | -8.283  | 1.00 | 0.00  | H |
| ATOM | 1364 | CA  | ASP | 95 | -1.345  | 1.592  | -7.272  | 1.00 | 21.42 | C |
| ATOM | 1365 | HA  | ASP | 95 | -2.412  | 1.388  | -7.414  | 1.00 | 0.00  | H |
| ATOM | 1366 | CB  | ASP | 95 | -0.906  | 0.734  | -6.065  | 1.00 | 22.01 | C |
| ATOM | 1367 | HB1 | ASP | 95 | -1.517  | 1.016  | -5.200  | 1.00 | 0.00  | H |
| ATOM | 1368 | HB2 | ASP | 95 | -1.156  | -0.312 | -6.276  | 1.00 | 0.00  | H |
| ATOM | 1369 | CG  | ASP | 95 | 0.584   | 0.799  | -5.665  | 1.00 | 25.03 | C |
| ATOM | 1370 | OD1 | ASP | 95 | 1.400   | 1.458  | -6.383  | 1.00 | 18.38 | O |
| ATOM | 1371 | OD2 | ASP | 95 | 0.874   | 0.142  | -4.630  | 1.00 | 33.04 | O |
| ATOM | 1372 | C   | ASP | 95 | -1.229  | 3.114  | -6.984  | 1.00 | 20.21 | C |
| ATOM | 1373 | O   | ASP | 95 | -2.254  | 3.775  | -6.826  | 1.00 | 19.04 | O |

|        |      |      |     |     |        |        |        |       |       |      |   |
|--------|------|------|-----|-----|--------|--------|--------|-------|-------|------|---|
| ATOM   | 1650 | N    | THR | 116 | 1.752  | -2.109 | 3.325  | 1.00  | 22.49 |      | N |
| ATOM   | 1651 | HN   | THR | 116 |        | 1.019  | -2.206 | 2.632 | 1.00  | 0.00 |   |
| H      |      |      |     |     |        |        |        |       |       |      |   |
| ATOM   | 1652 | CA   | THR | 116 | 2.883  | -3.040 | 3.214  | 1.00  | 17.24 |      | C |
| ATOM   | 1653 | HA   | THR | 116 |        | 3.181  | -3.379 | 4.218 | 1.00  | 0.00 |   |
| H      |      |      |     |     |        |        |        |       |       |      |   |
| ATOM   | 1654 | CB   | THR | 116 | 2.411  | -4.313 | 2.377  | 1.00  | 23.75 |      | C |
| ATOM   | 1655 | HB   | THR | 116 |        | 2.958  | -4.294 | 1.425 | 1.00  | 0.00 |   |
| H      |      |      |     |     |        |        |        |       |       |      |   |
| ATOM   | 1656 | OG1  | THR | 116 | 1.038  | -4.268 | 2.090  | 1.00  | 20.76 |      | O |
| ATOM   | 1657 | HG1  | THR | 116 | 0.962  | -3.706 | 1.272  | 1.00  | 0.00  |      | H |
| ATOM   | 1658 | CG2  | THR | 116 | 2.729  | -5.620 | 3.076  | 1.00  | 21.59 |      | C |
| ATOM   | 1659 | HG21 | THR | 116 | 2.556  | -6.463 | 2.400  | 1.00  | 0.00  |      | H |
| ATOM   | 1660 | HG22 | THR | 116 | 3.773  | -5.639 | 3.410  | 1.00  | 0.00  |      | H |
| ATOM   | 1661 | HG23 | THR | 116 | 2.070  | -5.751 | 3.938  | 1.00  | 0.00  |      | H |
| ATOM   | 1662 | C    | THR | 116 | 4.187  | -2.542 | 2.540  | 1.00  | 24.46 |      | C |
| ATOM   | 1663 | O    | THR | 116 | 5.244  | -2.708 | 3.160  | 1.00  | 18.70 |      | O |
| ATOM   | 2012 | N    | ASP | 140 | 11.528 | 0.228  | 0.719  | 1.00  | 18.27 |      | N |
| ATOM   | 2013 | HN   | ASP | 140 | 11.680 | 0.435  | -0.244 | 1.00  | 0.00  |      | H |
| ATOM   | 2014 | CA   | ASP | 140 | 10.241 | 0.680  | 1.186  | 1.00  | 22.74 |      | C |
| ATOM   | 2015 | HA   | ASP | 140 |        | 9.931  | 1.469  | 0.522 | 1.00  | 0.00 |   |
| H      |      |      |     |     |        |        |        |       |       |      |   |
| ATOM   | 2016 | CB   | ASP | 140 | 9.189  | -0.430 | 1.028  | 1.00  | 16.60 |      | C |
| ATOM   | 2017 | HB1  | ASP | 140 | 9.493  | -1.331 | 1.598  | 1.00  | 0.00  |      | H |
| ATOM   | 2018 | HB2  | ASP | 140 | 8.206  | -0.087 | 1.409  | 1.00  | 0.00  |      | H |
| ATOM   | 2019 | CG   | ASP | 140 | 9.019  | -0.822 | -0.434 | 1.00  | 24.88 |      | C |
| ATOM   | 2020 | OD1  | ASP | 140 | 9.649  | -0.242 | -1.367 | 1.00  | 22.74 |      | O |
| ATOM   | 2021 | OD2  | ASP | 140 | 8.217  | -1.760 | -0.658 | 1.00  | 19.30 |      | O |
| ATOM   | 2022 | C    | ASP | 140 | 10.376 | 1.364  | 2.542  | 1.00  | 15.06 |      | C |
| ATOM   | 2023 | O    | ASP | 140 | 9.816  | 0.963  | 3.562  | 1.00  | 16.59 |      | O |
| TER    | 4533 |      | ILE | 297 |        |        |        |       |       |      |   |
| HETATM | 4534 | C1   | GLO | 1   | 6.298  | -1.677 | -3.194 | 1.00  | 12.70 |      | C |
| HETATM | 4535 | H1   | GLO | 1   | 7.194  | -1.052 | -3.386 | 1.00  | 0.00  |      | H |
| HETATM | 4536 | O1   | GLO | 1   | 6.627  | -2.727 | -2.344 | 1.00  | 18.41 |      | O |
| HETATM | 4537 | H1A  | GLO | 1   | 7.238  | -2.363 | -1.642 | 1.00  | 0.00  |      | H |
| HETATM | 4538 | C2   | GLO | 1   | 5.771  | -2.211 | -4.524 | 1.00  | 13.93 |      | C |
| HETATM | 4539 | H2   | GLO | 1   | 4.836  | -2.751 | -4.300 | 1.00  | 0.00  |      | H |
| HETATM | 4540 | O2   | GLO | 1   | 6.709  | -3.101 | -5.090 | 1.00  | 17.69 |      | O |
| HETATM | 4541 | H2A  | GLO | 1   | 6.934  | -2.820 | -6.007 | 1.00  | 0.00  |      | H |
| HETATM | 4542 | C3   | GLO | 1   | 5.450  | -0.990 | -5.398 | 1.00  | 14.37 |      | C |
| HETATM | 4543 | H3   | GLO | 1   | 6.379  | -0.406 | -5.518 | 1.00  | 0.00  |      | H |
| HETATM | 4544 | O3   | GLO | 1   | 4.988  | -1.368 | -6.676 | 1.00  | 15.82 |      | O |
| HETATM | 4545 | H3A  | GLO | 1   | 5.640  | -1.005 | -7.320 | 1.00  | 0.00  |      | H |
| HETATM | 4546 | C4   | GLO | 1   | 4.400  | -0.112 | -4.722 | 1.00  | 12.99 |      | C |

|             |      |     |   |        |        |        |      |       |   |
|-------------|------|-----|---|--------|--------|--------|------|-------|---|
| HETATM 4547 | H4   | GLO | 1 | 3.463  | -0.680 | -4.723 | 1.00 | 0.00  | H |
| HETATM 4548 | O4   | GLO | 1 | 4.234  | 1.129  | -5.382 | 1.00 | 16.09 | O |
| HETATM 4549 | H4A  | GLO | 1 | 3.432  | 1.084  | -5.945 | 1.00 | 0.00  | H |
| HETATM 4550 | C5   | GLO | 1 | 4.773  | 0.221  | -3.274 | 1.00 | 13.50 | C |
| HETATM 4551 | H5   | GLO | 1 | 5.517  | 1.043  | -3.305 | 1.00 | 0.00  | H |
| HETATM 4552 | O5   | GLO | 1 | 5.305  | -0.883 | -2.551 | 1.00 | 13.60 | O |
| HETATM 4553 | C6   | GLO | 1 | 3.525  | 0.705  | -2.526 | 1.00 | 14.16 | C |
| HETATM 4554 | H6A  | GLO | 1 | 3.766  | 0.929  | -1.482 | 1.00 | 0.00  | H |
| HETATM 4555 | H6B  | GLO | 1 | 3.189  | 1.631  | -3.012 | 1.00 | 0.00  | H |
| HETATM 4556 | O6   | GLO | 1 | 2.505  | -0.267 | -2.516 | 1.00 | 15.87 | O |
| HETATM 4557 | H6C  | GLO | 1 | 1.966  | -0.158 | -3.333 | 1.00 | 0.00  | H |
| HETATM 4558 | C5   | ATP | 1 | -0.728 | -2.609 | 5.866  | 1.00 | 22.91 | C |
| HETATM 4559 | H5   | ATP | 1 | 0.310  | -2.196 | 5.812  | 1.00 | 0.00  | H |
| HETATM 4560 | O5   | ATP | 1 | -1.523 | -1.659 | 6.608  | 1.00 | 24.49 | O |
| HETATM 4561 | C8   | ATP | 1 | -1.259 | -1.894 | 7.945  | 1.00 | 24.51 | C |
| HETATM 4562 | H8   | ATP | 1 | -0.215 | -1.538 | 8.119  | 1.00 | 0.00  | H |
| HETATM 4563 | C10  | ATP | 1 | -2.994 | -0.050 | 10.480 | 1.00 | 28.07 | C |
| HETATM 4564 | N9   | ATP | 1 | -4.111 | -0.372 | 9.690  | 1.00 | 30.76 | N |
| HETATM 4565 | C9   | ATP | 1 | -3.572 | -1.040 | 8.682  | 1.00 | 25.92 | C |
| HETATM 4566 | H9   | ATP | 1 | -4.112 | -1.435 | 7.815  | 1.00 | 0.00  | H |
| HETATM 4567 | N8   | ATP | 1 | -2.209 | -1.202 | 8.794  | 1.00 | 24.23 | N |
| HETATM 4568 | N12  | ATP | 1 | -1.581 | 0.707  | 12.216 | 1.00 | 31.20 | N |
| HETATM 4569 | C12  | ATP | 1 | -0.561 | 0.204  | 11.533 | 1.00 | 30.86 | C |
| HETATM 4570 | H12  | ATP | 1 | 0.424  | 0.311  | 11.998 | 1.00 | 0.00  | H |
| HETATM 4571 | N11  | ATP | 1 | -0.586 | -0.483 | 10.402 | 1.00 | 25.68 | N |
| HETATM 4572 | C11  | ATP | 1 | -1.833 | -0.561 | 9.921  | 1.00 | 27.55 | C |
| HETATM 4573 | C13  | ATP | 1 | -2.826 | 0.620  | 11.715 | 1.00 | 34.82 | C |
| HETATM 4574 | N13  | ATP | 1 | -3.772 | 1.143  | 12.502 | 1.00 | 33.87 | N |
| HETATM 4575 | H13B | ATP | 1 | -3.377 | 1.403  | 13.405 | 1.00 | 0.00  | H |
| HETATM 4576 | H13A | ATP | 1 | -4.277 | 1.932  | 12.149 | 1.00 | 0.00  | H |
| HETATM 4577 | C7   | ATP | 1 | -1.317 | -3.387 | 8.102  | 1.00 | 25.14 | C |
| HETATM 4578 | H7   | ATP | 1 | -2.363 | -3.752 | 8.201  | 1.00 | 0.00  | H |
| HETATM 4579 | O7   | ATP | 1 | -0.530 | -3.837 | 9.191  | 1.00 | 22.96 | O |
| HETATM 4580 | H7A  | ATP | 1 | 0.356  | -4.014 | 8.824  | 1.00 | 0.00  | H |
| HETATM 4581 | C6   | ATP | 1 | -0.746 | -3.848 | 6.750  | 1.00 | 21.74 | C |
| HETATM 4582 | H6   | ATP | 1 | -1.455 | -4.573 | 6.294  | 1.00 | 0.00  | H |
| HETATM 4583 | O6   | ATP | 1 | 0.555  | -4.431 | 6.814  | 1.00 | 20.39 | O |
| HETATM 4584 | H6A  | ATP | 1 | 0.453  | -5.398 | 6.688  | 1.00 | 0.00  | H |
| HETATM 4585 | C4   | ATP | 1 | -1.301 | -2.860 | 4.479  | 1.00 | 17.35 | C |
| HETATM 4586 | H4A  | ATP | 1 | -0.568 | -3.399 | 3.879  | 1.00 | 0.00  | H |
| HETATM 4587 | H4B  | ATP | 1 | -2.194 | -3.485 | 4.609  | 1.00 | 0.00  | H |
| HETATM 4588 | O3   | ATP | 1 | -1.643 | -1.634 | 3.862  | 1.00 | 25.21 | O |
| HETATM 4589 | P3   | ATP | 1 | -3.083 | -1.587 | 3.090  | 1.00 | 25.58 | P |
| HETATM 4590 | O3A  | ATP | 1 | -3.119 | -0.201 | 2.489  | 1.00 | 19.33 | O |

|             |     |      |   |        |        |        |      |       |    |
|-------------|-----|------|---|--------|--------|--------|------|-------|----|
| HETATM 4591 | O3B | ATP  | 1 | -4.152 | -2.054 | 4.051  | 1.00 | 27.75 | O  |
| HETATM 4592 | O2  | ATP  | 1 | -2.935 | -2.789 | 2.003  | 1.00 | 23.57 | O  |
| HETATM 4593 | P2  | ATP  | 1 | -2.110 | -2.835 | 0.554  | 1.00 | 22.77 | P  |
| HETATM 4594 | O2A | ATP  | 1 | -2.869 | -1.940 | -0.411 | 1.00 | 24.45 | O  |
| HETATM 4595 | O2B | ATP  | 1 | -1.938 | -4.292 | 0.242  | 1.00 | 18.45 | O  |
| HETATM 4596 | O1  | ATP  | 1 | -0.710 | -2.124 | 1.020  | 1.00 | 23.12 | O  |
| HETATM 4597 | P1  | ATP  | 1 | 0.491  | -1.569 | -0.099 | 1.00 | 0.00  | P  |
| HETATM 4598 | O1C | ATP  | 1 | -0.238 | -1.703 | -1.435 | 1.00 | 0.00  | O  |
| HETATM 4599 | O1B | ATP  | 1 | 1.630  | -2.585 | 0.167  | 1.00 | 0.00  | O  |
| HETATM 4600 | O1A | ATP  | 1 | 0.823  | -0.143 | 0.333  | 1.00 | 0.00  | O  |
| HETATM 4601 | MG  | MGL  | 1 | -2.019 | -0.449 | -1.528 | 1.00 | 27.88 | LP |
| HETATM 4602 | OH2 | TIP3 | 1 | -1.649 | 0.720  | 0.249  | 1.00 | 18.54 | O  |
| HETATM 4603 | H1  | TIP3 | 1 | -2.118 | 0.303  | 1.008  | 1.00 | 0.00  | H  |
| HETATM 4604 | H2  | TIP3 | 1 | -0.677 | 0.552  | 0.423  | 1.00 | 0.00  | H  |
| HETATM 4614 | OH2 | TIP3 | 5 | -3.758 | 0.721  | -1.634 | 1.00 | 21.67 | O  |
| HETATM 4615 | H1  | TIP3 | 5 | -4.123 | 0.804  | -0.720 | 1.00 | 0.00  | H  |
| HETATM 4616 | H2  | TIP3 | 5 | -4.469 | 0.188  | -2.114 | 1.00 | 0.00  | H  |
| HETATM 4617 | OH2 | TIP3 | 6 | -0.627 | 0.815  | -2.464 | 1.00 | 23.98 | O  |
| HETATM 4618 | H1  | TIP3 | 6 | -0.260 | 0.399  | -3.287 | 1.00 | 0.00  | H  |
| HETATM 4619 | H2  | TIP3 | 6 | 0.113  | 0.695  | -1.833 | 1.00 | 0.00  | H  |
| HETATM 4620 | OH2 | TIP3 | 7 | -2.644 | -1.325 | -3.335 | 1.00 | 26.17 | O  |
| HETATM 4621 | H1  | TIP3 | 7 | -3.349 | -0.858 | -3.885 | 1.00 | 0.00  | H  |
| HETATM 4622 | H2  | TIP3 | 7 | -3.117 | -2.106 | -2.997 | 1.00 | 0.00  | H  |

The atomic coordinates of these atoms (QM part) for ATP $\gamma$ S-bound StHK.

|      |     |     |     |    |         |        |        |      |       |   |
|------|-----|-----|-----|----|---------|--------|--------|------|-------|---|
| ATOM | 200 | N   | LYS | 15 | -8.346  | -5.502 | -3.328 | 1.00 | 18.96 | N |
| ATOM | 201 | HN  | LYS | 15 | -7.712  | -4.933 | -3.892 | 1.00 | 0.00  | H |
| ATOM | 202 | CA  | LYS | 15 | -9.674  | -4.964 | -3.021 | 1.00 | 27.33 | C |
| ATOM | 203 | HA  | LYS | 15 | -10.271 | -5.711 | -2.479 | 1.00 | 0.00  | H |
| ATOM | 204 | CB  | LYS | 15 | -9.577  | -3.672 | -2.177 | 1.00 | 31.73 | C |
| ATOM | 205 | HB1 | LYS | 15 | -9.002  | -2.955 | -2.774 | 1.00 | 0.00  | H |
| ATOM | 206 | HB2 | LYS | 15 | -10.574 | -3.224 | -2.074 | 1.00 | 0.00  | H |
| ATOM | 207 | CG  | LYS | 15 | -8.939  | -3.869 | -0.784 | 1.00 | 46.58 | C |
| ATOM | 208 | HG1 | LYS | 15 | -9.699  | -3.695 | -0.013 | 1.00 | 0.00  | H |
| ATOM | 209 | HG2 | LYS | 15 | -8.607  | -4.912 | -0.669 | 1.00 | 0.00  | H |
| ATOM | 210 | CD  | LYS | 15 | -7.748  | -2.937 | -0.500 | 1.00 | 52.98 | C |
| ATOM | 211 | HD1 | LYS | 15 | -8.025  | -1.902 | -0.733 | 1.00 | 0.00  | H |
| ATOM | 212 | HD2 | LYS | 15 | -7.512  | -2.957 | 0.573  | 1.00 | 0.00  | H |
| ATOM | 213 | CE  | LYS | 15 | -6.489  | -3.319 | -1.277 | 1.00 | 55.66 | C |
| ATOM | 214 | HE1 | LYS | 15 | -6.206  | -4.358 | -1.104 | 1.00 | 0.00  | H |
| ATOM | 215 | HE2 | LYS | 15 | -6.623  | -3.200 | -2.352 | 1.00 | 0.00  | H |
| ATOM | 216 | NZ  | LYS | 15 | -5.333  | -2.436 | -0.895 | 1.00 | 52.51 | N |
| ATOM | 217 | HZ1 | LYS | 15 | -4.402  | -2.801 | -1.153 | 1.00 | 0.00  | H |
| ATOM | 218 | HZ2 | LYS | 15 | -5.447  | -1.544 | -1.439 | 1.00 | 0.00  | H |



|      |      |      |     |     |         |        |         |       |       |      |   |
|------|------|------|-----|-----|---------|--------|---------|-------|-------|------|---|
| ATOM | 219  | HZ3  | LYS | 15  | -5.245  | -2.235 | 0.128   | 1.00  | 0.00  |      | H |
| ATOM | 220  | C    | LYS | 15  | -10.349 | -4.620 | -4.372  | 1.00  | 26.81 |      | C |
| ATOM | 221  | O    | LYS | 15  | -9.776  | -3.796 | -5.077  | 1.00  | 22.30 |      | O |
| ATOM | 984  | N    | ASP | 71  | 7.157   | -1.842 | -11.081 | 1.00  | 30.04 |      | N |
| ATOM | 985  | HN   | ASP | 71  | 7.206   | -2.822 | -10.797 | 1.00  | 0.00  |      | H |
| ATOM | 986  | CA   | ASP | 71  | 8.214   | -0.955 | -10.591 | 1.00  | 32.00 |      | C |
| ATOM | 987  | HA   | ASP | 71  | 7.838   | 0.043  | -10.343 | 1.00  | 0.00  |      | H |
| ATOM | 988  | CB   | ASP | 71  | 8.823   | -1.553 | -9.299  | 1.00  | 28.61 |      | C |
| ATOM | 989  | HB1  | ASP | 71  | 9.201   | -2.561 | -9.500  | 1.00  | 0.00  |      | H |
| ATOM | 990  | HB2  | ASP | 71  | 9.680   | -0.952 | -8.968  | 1.00  | 0.00  |      | H |
| ATOM | 991  | CG   | ASP | 71  | 7.789   | -1.603 | -8.166  | 1.00  | 28.31 |      | C |
| ATOM | 992  | OD1  | ASP | 71  | 7.831   | -2.614 | -7.425  | 1.00  | 20.80 |      | O |
| ATOM | 993  | OD2  | ASP | 71  | 6.993   | -0.620 | -8.088  | 1.00  | 22.40 |      | O |
| ATOM | 994  | C    | ASP | 71  | 9.392   | -0.765 | -11.559 | 1.00  | 37.73 |      | C |
| ATOM | 995  | O    | ASP | 71  | 9.998   | 0.316  | -11.537 | 1.00  | 40.83 |      | O |
| ATOM | 1374 | N    | ASP | 95  | -0.470  | 1.121  | -8.518  | 1.00  | 17.31 |      | N |
| ATOM | 1375 | HN   | ASP | 95  | 0.519   | 1.014  | -8.301  | 1.00  | 0.00  |      | H |
| ATOM | 1376 | CA   | ASP | 95  | -1.278  | 1.618  | -7.379  | 1.00  | 21.42 |      | C |
| ATOM | 1377 | HA   | ASP | 95  | -2.329  | 1.372  | -7.566  | 1.00  | 0.00  |      | H |
| ATOM | 1378 | CB   | ASP | 95  | -0.859  | 0.813  | -6.124  | 1.00  | 22.01 |      | C |
| ATOM | 1379 | HB1  | ASP | 95  | -1.589  | 1.001  | -5.330  | 1.00  | 0.00  |      | H |
| ATOM | 1380 | HB2  | ASP | 95  | -0.925  | -0.254 | -6.375  | 1.00  | 0.00  |      | H |
| ATOM | 1381 | CG   | ASP | 95  | 0.570   | 1.097  | -5.599  | 1.00  | 25.03 |      | C |
| ATOM | 1382 | OD1  | ASP | 95  | 1.398   | 1.640  | -6.378  | 1.00  | 18.38 |      | O |
| ATOM | 1383 | OD2  | ASP | 95  | 0.801   | 0.739  | -4.407  | 1.00  | 33.04 |      | O |
| ATOM | 1384 | C    | ASP | 95  | -1.239  | 3.148  | -7.101  | 1.00  | 20.21 |      | C |
| ATOM | 1385 | O    | ASP | 95  | -2.298  | 3.753  | -6.945  | 1.00  | 19.04 |      | O |
| ATOM | 1662 | N    | THR | 116 | 1.719   | -1.920 | 2.950   | 1.00  | 22.49 |      | N |
| ATOM | 1663 | HN   | THR | 116 |         | 1.423  | -1.633  | 2.008 | 1.00  | 0.00 | H |
| ATOM | 1664 | CA   | THR | 116 | 2.789   | -2.939 | 3.054   | 1.00  | 17.24 |      | C |
| ATOM | 1665 | HA   | THR | 116 |         | 2.962  | -3.167  | 4.113 | 1.00  | 0.00 | H |
| ATOM | 1666 | CB   | THR | 116 | 2.161   | -4.228 | 2.456   | 1.00  | 23.75 |      | C |
| ATOM | 1667 | HB   | THR | 116 |         | 1.941  | -4.041  | 1.402 | 1.00  | 0.00 | H |
| ATOM | 1668 | OG1  | THR | 116 | 0.953   | -4.450 | 3.172   | 1.00  | 20.76 |      | O |
| ATOM | 1669 | HG1  | THR | 116 | 0.555   | -3.558 | 3.225   | 1.00  | 0.00  |      | H |
| ATOM | 1670 | CG2  | THR | 116 | 3.074   | -5.431 | 2.582   | 1.00  | 21.59 |      | C |
| ATOM | 1671 | HG21 | THR | 116 | 2.509   | -6.355 | 2.419   | 1.00  | 0.00  |      | H |
| ATOM | 1672 | HG22 | THR | 116 | 3.872   | -5.376 | 1.832   | 1.00  | 0.00  |      | H |
| ATOM | 1673 | HG23 | THR | 116 | 3.540   | -5.489 | 3.570   | 1.00  | 0.00  |      | H |
| ATOM | 1674 | C    | THR | 116 | 4.179   | -2.586 | 2.474   | 1.00  | 24.46 |      | C |
| ATOM | 1675 | O    | THR | 116 | 5.145   | -2.794 | 3.218   | 1.00  | 18.70 |      | O |

|        |      |     |     |     |        |        |        |       |       |      |   |
|--------|------|-----|-----|-----|--------|--------|--------|-------|-------|------|---|
| ATOM   | 2024 | N   | ASP | 140 | 11.582 | 0.397  | 0.814  | 1.00  | 18.27 |      | N |
| ATOM   | 2025 | HN  | ASP | 140 | 11.790 | 0.754  | -0.092 | 1.00  | 0.00  |      | H |
| ATOM   | 2026 | CA  | ASP | 140 | 10.240 | 0.689  | 1.238  | 1.00  | 22.74 |      | C |
| ATOM   | 2027 | HA  | ASP | 140 |        | 9.882  | 1.475  | 0.591 | 1.00  | 0.00 | H |
| ATOM   | 2028 | CB  | ASP | 140 | 9.312  | -0.519 | 1.007  | 1.00  | 16.60 |      | C |
| ATOM   | 2029 | HB1 | ASP | 140 | 9.705  | -1.412 | 1.532  | 1.00  | 0.00  |      | H |
| ATOM   | 2030 | HB2 | ASP | 140 | 8.302  | -0.299 | 1.407  | 1.00  | 0.00  |      | H |
| ATOM   | 2031 | CG  | ASP | 140 | 9.165  | -0.859 | -0.469 | 1.00  | 24.88 |      | C |
| ATOM   | 2032 | OD1 | ASP | 140 | 9.801  | -0.251 | -1.376 | 1.00  | 22.74 |      | O |
| ATOM   | 2033 | OD2 | ASP | 140 | 8.360  | -1.786 | -0.728 | 1.00  | 19.30 |      | O |
| ATOM   | 2034 | C   | ASP | 140 | 10.202 | 1.314  | 2.628  | 1.00  | 15.06 |      | C |
| ATOM   | 2035 | O   | ASP | 140 | 9.388  | 0.991  | 3.494  | 1.00  | 16.59 |      | O |
| HETATM | 4546 | C1  | GLO | 1   | 6.332  | -1.711 | -3.160 | 1.00  | 12.70 |      | C |
| HETATM | 4547 | H1  | GLO | 1   | 7.234  | -1.103 | -3.378 | 1.00  | 0.00  |      | H |
| HETATM | 4548 | O1  | GLO | 1   | 6.659  | -2.748 | -2.298 | 1.00  | 18.41 |      | O |
| HETATM | 4549 | H1A | GLO | 1   | 7.327  | -2.390 | -1.645 | 1.00  | 0.00  |      | H |
| HETATM | 4550 | C2  | GLO | 1   | 5.760  | -2.253 | -4.472 | 1.00  | 13.93 |      | C |
| HETATM | 4551 | H2  | GLO | 1   | 4.802  | -2.730 | -4.216 | 1.00  | 0.00  |      | H |
| HETATM | 4552 | O2  | GLO | 1   | 6.616  | -3.215 | -5.054 | 1.00  | 17.69 |      | O |
| HETATM | 4553 | H2A | GLO | 1   | 6.934  | -2.892 | -5.929 | 1.00  | 0.00  |      | H |
| HETATM | 4554 | C3  | GLO | 1   | 5.512  | -1.033 | -5.362 | 1.00  | 14.37 |      | C |
| HETATM | 4555 | H3  | GLO | 1   | 6.486  | -0.544 | -5.527 | 1.00  | 0.00  |      | H |
| HETATM | 4556 | O3  | GLO | 1   | 4.964  | -1.373 | -6.621 | 1.00  | 15.82 |      | O |
| HETATM | 4557 | H3A | GLO | 1   | 5.628  | -1.060 | -7.286 | 1.00  | 0.00  |      | H |
| HETATM | 4558 | C4  | GLO | 1   | 4.591  | -0.017 | -4.695 | 1.00  | 12.99 |      | C |
| HETATM | 4559 | H4  | GLO | 1   | 3.575  | -0.436 | -4.688 | 1.00  | 0.00  |      | H |
| HETATM | 4560 | O4  | GLO | 1   | 4.625  | 1.215  | -5.397 | 1.00  | 16.09 |      | O |
| HETATM | 4561 | H4A | GLO | 1   | 4.192  | 1.071  | -6.269 | 1.00  | 0.00  |      | H |
| HETATM | 4562 | C5  | GLO | 1   | 5.003  | 0.292  | -3.257 | 1.00  | 13.50 |      | C |
| HETATM | 4563 | H5  | GLO | 1   | 5.871  | 0.979  | -3.300 | 1.00  | 0.00  |      | H |
| HETATM | 4564 | O5  | GLO | 1   | 5.356  | -0.877 | -2.531 | 1.00  | 13.60 |      | O |
| HETATM | 4565 | C6  | GLO | 1   | 3.867  | 1.018  | -2.522 | 1.00  | 14.16 |      | C |
| HETATM | 4566 | H6A | GLO | 1   | 4.194  | 1.263  | -1.508 | 1.00  | 0.00  |      | H |
| HETATM | 4567 | H6B | GLO | 1   | 3.695  | 1.956  | -3.065 | 1.00  | 0.00  |      | H |
| HETATM | 4568 | O6  | GLO | 1   | 2.696  | 0.264  | -2.390 | 1.00  | 15.87 |      | O |
| HETATM | 4569 | H6C | GLO | 1   | 2.126  | 0.383  | -3.180 | 1.00  | 0.00  |      | H |
| HETATM | 4570 | C5  | ATP | 1   | -1.492 | -2.686 | 5.485  | 1.00  | 22.91 |      | C |
| HETATM | 4571 | H5  | ATP | 1   | -0.617 | -2.501 | 4.811  | 1.00  | 0.00  |      | H |
| HETATM | 4572 | O5  | ATP | 1   | -1.641 | -1.533 | 6.359  | 1.00  | 24.49 |      | O |
| HETATM | 4573 | C8  | ATP | 1   | -1.406 | -1.909 | 7.690  | 1.00  | 24.51 |      | C |
| HETATM | 4574 | H8  | ATP | 1   | -0.326 | -1.699 | 7.877  | 1.00  | 0.00  |      | H |
| HETATM | 4575 | C10 | ATP | 1   | -2.954 | -0.036 | 10.361 | 1.00  | 28.07 |      | C |
| HETATM | 4576 | N9  | ATP | 1   | -4.104 | -0.292 | 9.594  | 1.00  | 30.76 |      | N |

|             |      |      |   |        |        |        |      |       |    |
|-------------|------|------|---|--------|--------|--------|------|-------|----|
| HETATM 4577 | C9   | ATP  | 1 | -3.622 | -0.950 | 8.553  | 1.00 | 25.92 | C  |
| HETATM 4578 | H9   | ATP  | 1 | -4.206 | -1.297 | 7.695  | 1.00 | 0.00  | H  |
| HETATM 4579 | N8   | ATP  | 1 | -2.264 | -1.165 | 8.609  | 1.00 | 24.23 | N  |
| HETATM 4580 | N12  | ATP  | 1 | -1.471 | 0.630  | 12.082 | 1.00 | 31.20 | N  |
| HETATM 4581 | C12  | ATP  | 1 | -0.490 | 0.106  | 11.353 | 1.00 | 30.86 | C  |
| HETATM 4582 | H12  | ATP  | 1 | 0.510  | 0.169  | 11.793 | 1.00 | 0.00  | H  |
| HETATM 4583 | N11  | ATP  | 1 | -0.570 | -0.561 | 10.208 | 1.00 | 25.68 | N  |
| HETATM 4584 | C11  | ATP  | 1 | -1.829 | -0.576 | 9.753  | 1.00 | 27.55 | C  |
| HETATM 4585 | C13  | ATP  | 1 | -2.734 | 0.595  | 11.612 | 1.00 | 34.82 | C  |
| HETATM 4586 | N13  | ATP  | 1 | -3.661 | 1.120  | 12.429 | 1.00 | 33.87 | N  |
| HETATM 4587 | H13B | ATP  | 1 | -3.267 | 1.375  | 13.332 | 1.00 | 0.00  | H  |
| HETATM 4588 | H13A | ATP  | 1 | -4.198 | 1.892  | 12.089 | 1.00 | 0.00  | H  |
| HETATM 4589 | C7   | ATP  | 1 | -1.661 | -3.387 | 7.786  | 1.00 | 25.14 | C  |
| HETATM 4590 | H7   | ATP  | 1 | -2.744 | -3.620 | 7.879  | 1.00 | 0.00  | H  |
| HETATM 4591 | O7   | ATP  | 1 | -0.938 | -3.965 | 8.859  | 1.00 | 22.96 | O  |
| HETATM 4592 | H7A  | ATP  | 1 | -0.025 | -4.066 | 8.540  | 1.00 | 0.00  | H  |
| HETATM 4593 | C6   | ATP  | 1 | -1.161 | -3.859 | 6.422  | 1.00 | 21.74 | C  |
| HETATM 4594 | H6   | ATP  | 1 | -1.755 | -4.739 | 6.093  | 1.00 | 0.00  | H  |
| HETATM 4595 | O6   | ATP  | 1 | 0.229  | -4.204 | 6.425  | 1.00 | 20.39 | O  |
| HETATM 4596 | H6A  | ATP  | 1 | 0.295  | -5.180 | 6.381  | 1.00 | 0.00  | H  |
| HETATM 4597 | C4   | ATP  | 1 | -2.768 | -2.920 | 4.655  | 1.00 | 17.35 | C  |
| HETATM 4598 | H4A  | ATP  | 1 | -2.565 | -3.702 | 3.918  | 1.00 | 0.00  | H  |
| HETATM 4599 | H4B  | ATP  | 1 | -3.542 | -3.288 | 5.352  | 1.00 | 0.00  | H  |
| HETATM 4600 | O3   | ATP  | 1 | -3.234 | -1.725 | 4.063  | 1.00 | 25.21 | O  |
| HETATM 4601 | P3   | ATP  | 1 | -3.311 | -1.510 | 2.424  | 1.00 | 25.58 | P  |
| HETATM 4602 | O3A  | ATP  | 1 | -3.022 | -0.031 | 2.224  | 1.00 | 19.33 | O  |
| HETATM 4603 | O3B  | ATP  | 1 | -4.597 | -2.099 | 1.899  | 1.00 | 27.75 | O  |
| HETATM 4604 | O2   | ATP  | 1 | -2.003 | -2.383 | 1.977  | 1.00 | 23.57 | O  |
| HETATM 4605 | P2   | ATP  | 1 | -1.832 | -3.068 | 0.457  | 1.00 | 22.77 | P  |
| HETATM 4606 | O2A  | ATP  | 1 | -2.527 | -2.112 | -0.517 | 1.00 | 24.45 | O  |
| HETATM 4607 | O2B  | ATP  | 1 | -2.294 | -4.491 | 0.508  | 1.00 | 18.45 | O  |
| HETATM 4608 | O1   | ATP  | 1 | -0.236 | -3.059 | 0.308  | 1.00 | 23.12 | O  |
| HETATM 4609 | P1   | ATP  | 1 | 0.915  | -1.961 | -0.423 | 1.00 | 0.00  | P  |
| HETATM 4610 | S1   | ATP  | 1 | 0.260  | -1.750 | -2.314 | 1.00 | 0.00  | S  |
| HETATM 4611 | O1B  | ATP  | 1 | 2.199  | -2.764 | -0.270 | 1.00 | 0.00  | O  |
| HETATM 4612 | O1A  | ATP  | 1 | 0.825  | -0.717 | 0.464  | 1.00 | 0.00  | O  |
| HETATM 4613 | MG   | MGL  | 1 | -1.970 | -0.507 | -1.731 | 1.00 | 27.88 | LP |
| HETATM 4614 | OH2  | TIP3 | 1 | -1.386 | 0.583  | -0.000 | 1.00 | 18.54 | O  |
| HETATM 4615 | H1   | TIP3 | 1 | -1.956 | 0.346  | 0.769  | 1.00 | 0.00  | H  |
| HETATM 4616 | H2   | TIP3 | 1 | -0.485 | 0.186  | 0.226  | 1.00 | 0.00  | H  |
| HETATM 4626 | OH2  | TIP3 | 5 | -3.784 | 0.568  | -1.615 | 1.00 | 21.67 | O  |
| HETATM 4627 | H1   | TIP3 | 5 | -4.200 | 0.727  | -0.733 | 1.00 | 0.00  | H  |
| HETATM 4628 | H2   | TIP3 | 5 | -4.537 | 0.252  | -2.189 | 1.00 | 0.00  | H  |
| HETATM 4629 | OH2  | TIP3 | 6 | -1.221 | 1.129  | -2.784 | 1.00 | 23.98 | O  |

|             |     |      |   |        |        |        |      |       |   |
|-------------|-----|------|---|--------|--------|--------|------|-------|---|
| HETATM 4630 | H1  | TIP3 | 6 | -0.423 | 0.908  | -3.368 | 1.00 | 0.00  | H |
| HETATM 4631 | H2  | TIP3 | 6 | -0.891 | 1.706  | -2.076 | 1.00 | 0.00  | H |
| HETATM 4632 | OH2 | TIP3 | 7 | -2.764 | -1.399 | -3.460 | 1.00 | 26.17 | O |
| HETATM 4633 | H1  | TIP3 | 7 | -3.492 | -0.911 | -3.957 | 1.00 | 0.00  | H |
| HETATM 4634 | H2  | TIP3 | 7 | -2.153 | -1.757 | -4.123 | 1.00 | 0.00  | H |

Fig. S 1 The relative energies of the optimized structures obtained at B3LYP/6-31G(d)/CHARMM22 level in the phosphate transfer process and the proton transfer process. The curves colored in black, red and blue denotes the relative energies in ATP-bound StHK, ATP-bound K15A mutant, and ATP $\gamma$ S-bound StHK complexes, respectively.

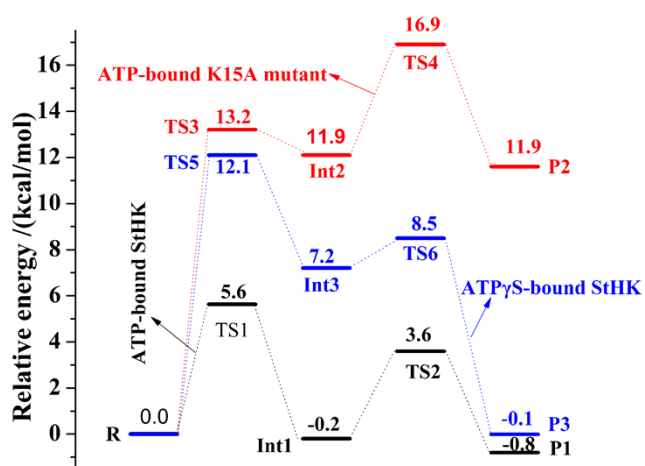

Supplement: c4ra16652c1.pdf [file c4ra16652c1.pdf]
